# Supplementary material
Source: PubMed Central journal article supplement (PMC2915677)
Supplement: supp_M110.126615_jbc.M110.126615-1.pdf [file supp_M110.126615_jbc.M110.126615-1.pdf]

**TABLE S1 (Supplementary material)**

| Oligonucleotide sequence                               | Name             | Use                  |
|--------------------------------------------------------|------------------|----------------------|
| ttggttgcttgcgcatgta                                    | XylU fwd         | RT-PCR. Upper operon |
| tcacagactccaggcgtaacg                                  | XylU rev         | RT-PCR. Upper operon |
| tgagttgctgcccggaaaaag                                  | XylM fwd         | RT-PCR. Upper operon |
| gccctagaaggaaacacacaaaag                               | XylM rev         | RT-PCR. Upper operon |
| gctcgtcaacaacgtgacctatat                               | XylA fwd         | RT-PCR. Upper operon |
| agcgcccaccccaatc                                       | XylA rev         | RT-PCR. Upper operon |
| gatggctgccgtgttagca                                    | XylB fwd         | RT-PCR. Upper operon |
| agttccagccggttttcctt                                   | XylB rev         | RT-PCR. Upper operon |
| ttcgaacaacagaggaccctatg                                | XylN fwd         | RT-PCR. Upper operon |
| cgaaggtccagttggaacc                                    | XylN rev         | RT-PCR. Upper operon |
| tcgtcaatgcctgcagca                                     | XylX fwd         | RT-PCR. Meta operon  |
| gcctgtttccactcctaagc                                   | XylX rev         | RT-PCR. Meta operon  |
| cacctcgaaacctgggaaga                                   | XylE fwd         | RT-PCR. Meta operon  |
| gatgtgtcggatcatggagatca                                | XylE rev         | RT-PCR. Meta operon  |
| gcgccaatatcgacgagttc                                   | XylQ fwd         | RT-PCR. Meta operon  |
| ggcgccgccaatca                                         | XylQ rev         | RT-PCR. Meta operon  |
| cgagctgcagaccagggtt                                    | XylR fwd         | RT-PCR; <i>xyIR</i>  |
| gccgtaataactgcccatcgt                                  | XylR rev         | RT-PCR; <i>xyIR</i>  |
| cggagctggcgtgatg                                       | XylS fwd         | RT-PCR; <i>xyIS</i>  |
| tggtgccggcatgctt                                       | XylS rev         | RT-PCR; <i>xyIS</i>  |
| caacgatgacgacgaatgg                                    | rpoN fwd         | RT-PCR; <i>rpoN</i>  |
| atcagggtcacggcaatc                                     | rpoN rev         | RT-PCR; <i>rpoN</i>  |
| <b>gaaattaatac</b> gactcactatagggactaaaataaaaatagtggtg | PT7::Pu fwd      | RNA run-offs         |
| <b>gaaattaatac</b> gactcactatagggagtggtgaccctcaatgtgtg | PT7::Pu-cont fwd | RNA run-offs         |
| gcgaaagcaaccaatctgaaca                                 | Pu rev           | RNA run-offs         |

|                                                                 |            |              |
|-----------------------------------------------------------------|------------|--------------|
| <b>gaaattaatac</b> <b>gactcactataggg</b> acagaaacaataataatggagt | Pm PT7     | RNA run-offs |
| caacgagactatctatatagtc                                          | Pm rev     | RNA run-offs |
| <b>gaaattaatac</b> <b>gactcactataggg</b> accacctaagcaaataag     | Pr T7 prom | RNA run-offs |
| gcatatcctcatgctgcatctt                                          | Pr rev     | RNA run-offs |
| <b>gaaattaatac</b> <b>gactcactataggg</b> tcactgattgcaaaaaggatgg | Ps T7 prom | RNA run-offs |
| ggacgaagatctgacttttctc                                          | Ps rev     | RNA run-offs |
